# Supplementary material
Source: PubMed Central journal article supplement (PMC3841327)
Supplement: cc-12-2493-s01.pdf [file cc-12-2493-s01.pdf]

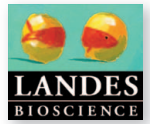

## **Supplemental Material to:**

**Michael G. Garelick, Vivian MacKay, Aya Yanagida,  
Emmeline C. Academia, Warren C. Ladiges, and Brian K.  
Kennedy**

**Chronic rapamycin treatment or lack of S6K1 does not  
reduce ribosome activity in vivo**

**Cell Cycle 2013; 12(15)**

**<http://dx.doi.org/10.4161/cc.25512>**

**<http://www.landesbioscience.com/journals/cc/article/25512>**

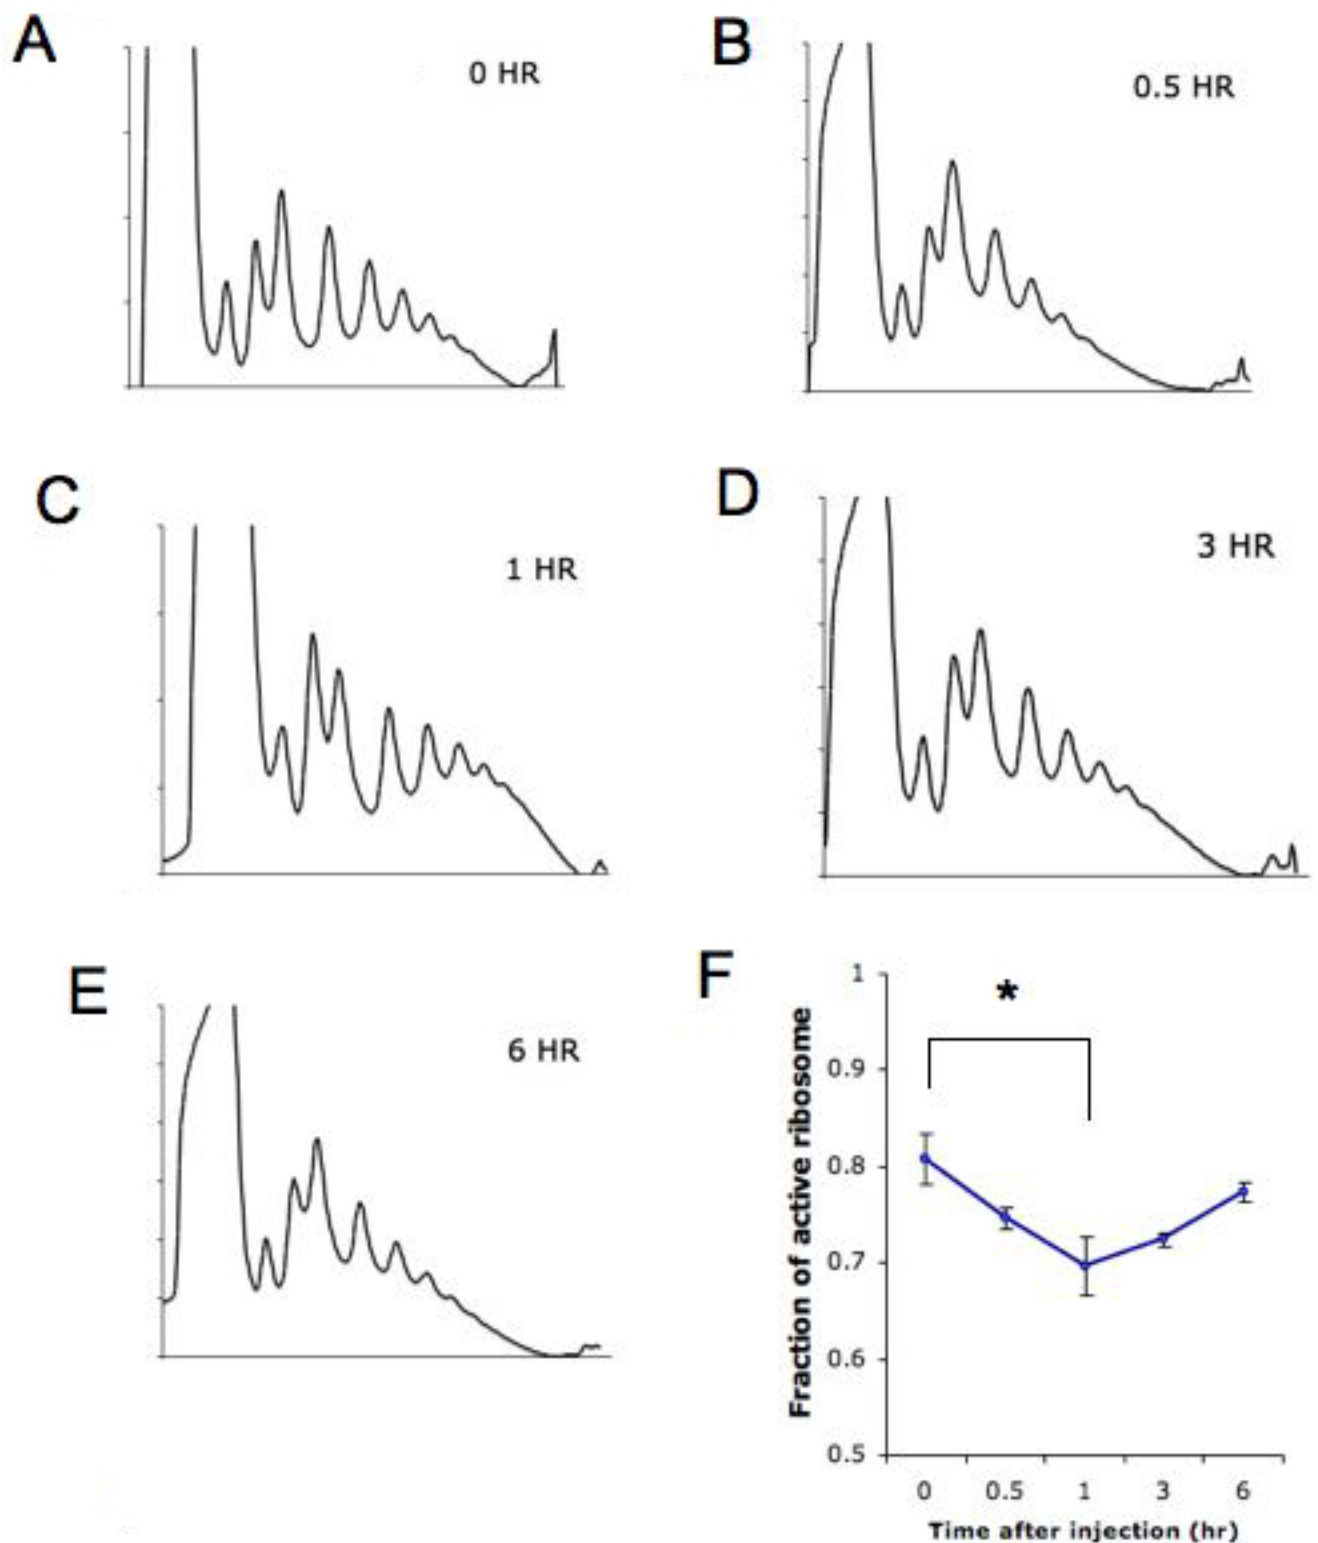

**Supplemental Fig. 1:** Rapamycin reduces translation 1 hr after injection. A-E: Representative liver polysome at 0 hr (A), 0.5 hr (B), 1 hr (C), 3 hr (D), and 6 hr (E). F: Quantification of ARA analysis of liver tissue following rapamycin injection. \* =  $p < 0.05$ , 1 way ANOVA with Bon Feroni Post hoc test. For all time points,  $n = 3$ .
